# Supplementary material
Source: Springer Nature journal article supplement (https://www.springermedizin.de/resource/supplementary/13020_2012_189_MOESM3_ESM.pdf/9641164)

**2,4,5-TMB**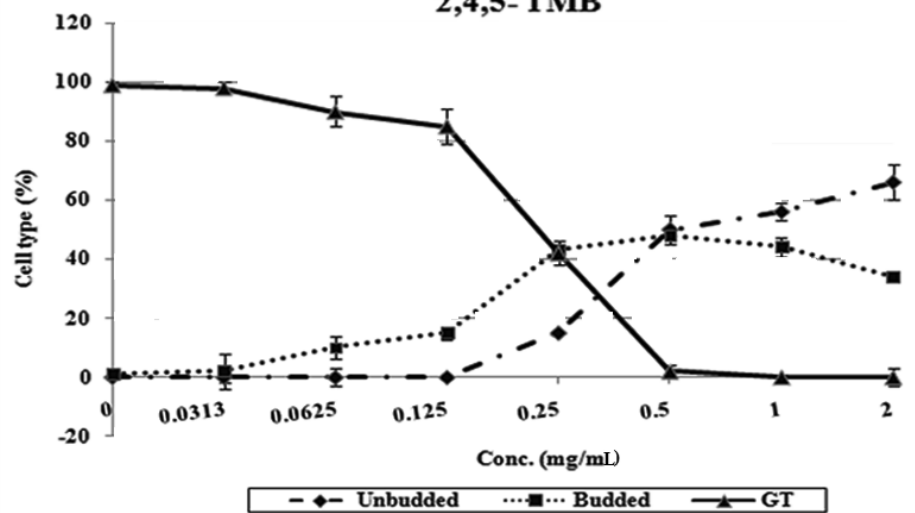**2,3,4-TMB**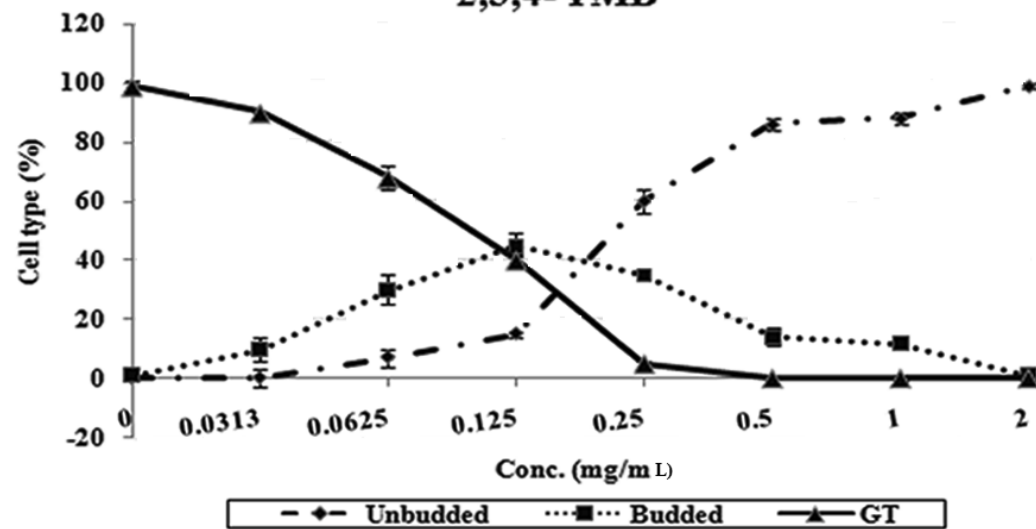**3,4,5-TMB**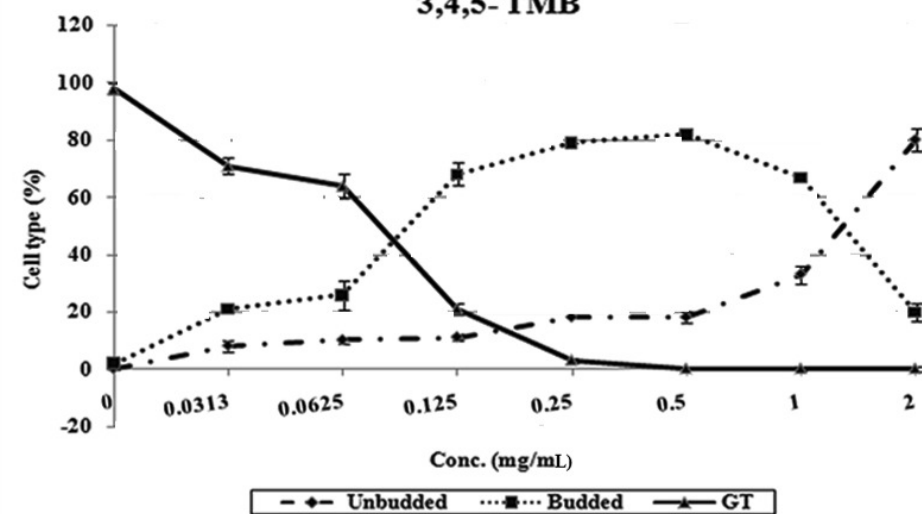**2,4,6-TMB**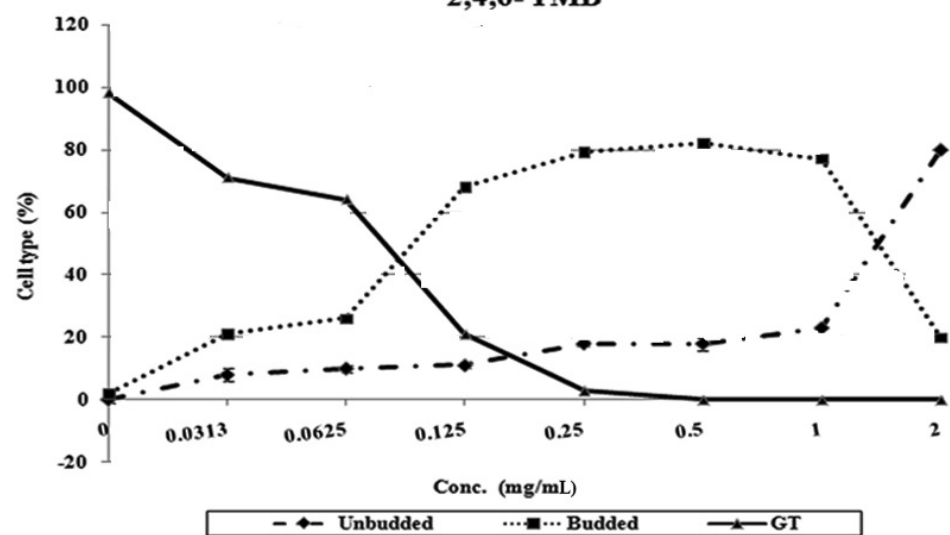

Supplement: MOESM3 [file 9641164]
